# Supplementary material for: Relationship between Hearing Loss and Dementia Differs According to the Underlying Mechanism
Source: PubMed Central journal article supplement — J Clin Neurol. 2021 Mar 18;17(2):290–9. doi: 10.3988/jcn.2021.17.2.290 (PMC8053549; doi:10.3988/jcn.2021.17.2.290), 2021-03-18
Supplement: jcn-17-290-s001.pdf [file jcn-17-290-s001.pdf]

**Supplementary Table 1.** Univariate association of each factor with the degree of hearing impairment

|                                 | PTA           |         | WRS          |         |
|---------------------------------|---------------|---------|--------------|---------|
|                                 | Beta (SE)     | p value | Beta (SE)    | p value |
| Duration, cognitive dysfunction | -0.72 (0.80)  | 0.369   | 0.45 (1.13)  | 0.695   |
| Duration, Parkinsonism          | -0.01 (0.77)  | 0.994   | -0.06 (1.10) | 0.956   |
| Vascular risk factors           |               |         |              |         |
| Hypertension                    | 2.06 (3.09)   | 0.505   | -1.83 (4.37) | 0.676   |
| Diabetes mellitus               | 1.48 (3.28)   | 0.651   | -0.68 (4.63) | 0.883   |
| Dyslipidemia                    | -5.45 (3.57)  | 0.130   | 7.17 (5.04)  | 0.158   |
| Smoking                         | -4.92 (4.51)  | 0.279   | 12.41 (6.30) | 0.051   |
| MRI vascular markers            |               |         |              |         |
| Deep WMH                        | -0.17 (2.23)  | 0.941   | 1.35 (3.14)  | 0.668   |
| Periventricular WMH             | 3.10 (1.91)   | 0.108   | -3.78 (2.71) | 0.166   |
| Lacunes                         | 0.50 (0.35)   | 0.154   | -0.02 (0.49) | 0.972   |
| CMBs                            | 0.27 (0.24)   | 0.260   | -0.70 (0.33) | 0.039*  |
| APOE4 carriage                  | -7.66 (3.09)  | 0.015*  | 7.67 (4.39)  | 0.083   |
| Cognitive status, demented      | -2.10 (3.00)  | 0.486   | -1.55 (4.25) | 0.716   |
| BDI                             | 0.20 (0.16)   | 0.218   | -0.45 (0.21) | 0.038*  |
| Comprehension dysfunction       | 8.25 (3.16)   | 0.010*  | -9.38 (4.38) | 0.035*  |
| K-MMSE                          | 0.90 (0.33)   | 0.008*  | -0.29 (0.48) | 0.549   |
| ADCI diagnosis                  | -12.24 (2.72) | <0.001* | 13.00 (4.00) | 0.002*  |
| LBCI diagnosis                  | -0.60 (3.42)  | 0.861   | -3.69 (4.82) | 0.446   |
| Diagnosis                       |               |         |              |         |
| Pure ADCI                       | -9.93 (4.06)  | 0.016*  | 13.34 (5.95) | 0.027*  |
| Pure LBCI                       | Reference     |         | Reference    |         |
| Mixed ADCI/LBCI                 | -13.34 (3.14) | <0.001* | 15.64 (4.59) | 0.001*  |
| Non-ADCI/LBCI                   | -0.57 (5.14)  | 0.911   | 9.42 (7.51)  | 0.213   |

Data are results of general linear models for hearing indices using each factor as a predictor after controlling for age, sex, and education.

\* $p < 0.05$ .

ADCI: Alzheimer's disease-related cognitive impairment, APOE4: apolipoprotein E gene E4 variant, BDI: Beck Depression Inventory, CMBs: cerebral microbleeds, K-MMSE: Korean version of Mini-Mental State Examination, LBCI: Lewy-body disease-related cognitive impairment, PTA: pure-tone average, WMHs: white-matter hyperintensities, WRS: word recognition score.
