# Supplementary material for: Relationship between Hearing Loss and Dementia Differs According to the Underlying Mechanism
Source: PubMed Central journal article supplement — J Clin Neurol. 2021 Mar 18;17(2):290–9. doi: 10.3988/jcn.2021.17.2.290 (PMC8053549; doi:10.3988/jcn.2021.17.2.290), 2021-03-18
Supplement: jcn-17-290-s002.pdf [file jcn-17-290-s002.pdf]

**Supplementary Table 2.** Univariate association of each factor with the presence of hearing loss

|                                 | PTA-based HL      |         | WRS-based HL     |         |
|---------------------------------|-------------------|---------|------------------|---------|
|                                 | OR (95% CI)       | p value | OR (95% CI)      | p value |
| Duration, cognitive dysfunction | 0.97 (0.78–1.21)  | 0.809   | 0.98 (0.79–1.26) | 0.981   |
| Duration, Parkinsonism          | 1.06 (0.86–1.30)  | 0.612   | 1.08 (0.88–1.33) | 0.443   |
| Vascular risk factors           |                   |         |                  |         |
| Hypertension                    | 1.12 (0.48–2.63)  | 0.788   | 0.95 (0.39–2.32) | 0.906   |
| Diabetes mellitus               | 1.08 (0.45–2.60)  | 0.864   | 1.10 (0.44–2.74) | 0.838   |
| Dyslipidemia                    | 0.71 (0.26–1.93)  | 0.502   | 0.70 (0.24–2.09) | 0.525   |
| Smoking                         | 0.39 (0.11–1.42)  | 0.152   | 0.20 (0.05–0.79) | 0.022*  |
| MRI vascular markers            |                   |         |                  |         |
| Deep WMH                        | 1.09 (0.59–2.01)  | 0.793   | 0.96 (0.50–1.85) | 0.901   |
| Periventricular WMH             | 1.84 (1.06–3.21)  | 0.031*  | 1.31 (0.74–2.29) | 0.353   |
| Lacunes                         | 1.03 (0.93–1.13)  | 0.601   | 0.99 (0.90–1.09) | 0.856   |
| CMBs                            | 1.09 (0.94–1.26)  | 0.275   | 1.04 (0.96–1.13) | 0.384   |
| APOE4 allele carriage           | 0.65 (0.27–1.56)  | 0.334   | 0.64 (0.24–1.72) | 0.377   |
| Cognitive status, demented      | 0.84 (0.36–1.93)  | 0.677   | 1.22 (0.50–2.98) | 0.667   |
| BDI                             | 1.03 (0.98–1.08)  | 0.198   | 1.04 (0.99–1.09) | 0.097   |
| Comprehension dysfunction       | 2.72 (0.97–7.66)  | 0.058   | 1.44 (0.53–3.89) | 0.471   |
| K-MMSE                          | 1.09 (0.99–1.21)  | 0.076   | 1.01 (0.91–1.11) | 0.896   |
| ADCI diagnosis                  | 0.16 (0.07–0.41)  | <0.001* | 0.40 (0.17–0.95) | 0.038*  |
| LBCI diagnosis                  | 1.44 (0.56–3.69)  | 0.452   | 2.29 (0.75–7.05) | 0.148   |
| Disease group                   |                   |         |                  |         |
| Pure ADCI                       | 0.12 (0.03–0.48)  | 0.003*  | 0.25 (0.06–1.07) | 0.061   |
| Pure LBCI                       | Reference         |         | Reference        |         |
| Mixed ADCI/LBCI                 | 0.23 (0.08–0.63)  | 0.004*  | 0.40 (0.15–1.06) | 0.067   |
| Non-ADCI/LBCI                   | 2.19 (0.36–13.19) | 0.394   | 0.54 (0.11–2.64) | 0.449   |

Data are results of logistic regression analyses for the presence of hearing loss using each factor as a predictor after controlling for age, sex, and education. PTA-based HL was defined as PTA<sub>4</sub> >40 (dB HL) and WRS-based HL was defined as WRS <70 (%).

\*p<0.05.

ADCI: Alzheimer's disease-related cognitive impairment, APOE4: apolipoprotein E gene E4 variant, BDI: Beck Depression Inventory, CI: confidence interval, CMBs: cerebral microbleeds, HL: hearing loss, K-MMSE: Korean version of Mini-Mental State Examination, LBCI: Lewy-body disease-related cognitive impairment, OR: odds ratio, PTA: pure-tone average, WMHs: white-matter hyperintensities, WRS: word recognition score.
