# Supplementary material for: Relationship between Hearing Loss and Dementia Differs According to the Underlying Mechanism
Source: PubMed Central journal article supplement — J Clin Neurol. 2021 Mar 18;17(2):290–9. doi: 10.3988/jcn.2021.17.2.290 (PMC8053549; doi:10.3988/jcn.2021.17.2.290), 2021-03-18
Supplement: jcn-17-290-s003.pdf [file jcn-17-290-s003.pdf]

**Supplementary Table 3.** Univariate association of each factor with the presence of comprehension dysfunction

|                                 | OR (95% CI)       | p value |
|---------------------------------|-------------------|---------|
| Duration, cognitive dysfunction | 1.12 (0.86–1.46)  | 0.408   |
| Duration, parkinsonism          | 1.16 (0.93–1.45)  | 0.189   |
| Vascular risk factors           |                   |         |
| Hypertension                    | 1.30 (0.49–3.49)  | 0.598   |
| Diabetes mellitus               | 2.59 (0.99–6.76)  | 0.053   |
| Dyslipidemia                    | 0.69 (0.21–2.26)  | 0.541   |
| Smoking                         | 0.42 (0.10–1.82)  | 0.247   |
| MRI vascular markers            |                   |         |
| Deep WMH                        | 1.44 (0.71–2.91)  | 0.314   |
| Periventricular WMH             | 2.19 (1.12–4.30)  | 0.023*  |
| Lacunae                         | 1.08 (0.98–1.20)  | 0.124   |
| CMBs                            | 1.13 (0.97–1.32)  | 0.116   |
| <i>APOE4</i> allele carriage    | 0.32 (0.10–1.04)  | 0.058   |
| BDI                             | 1.00 (0.95–1.06)  | 0.949   |
| K-MMSE                          | 0.82 (0.72–0.94)  | 0.004*  |
| PTA                             | 1.05 (1.01–1.09)  | 0.009*  |
| WRS                             | 0.98 (0.95–0.999) | 0.042*  |
| ADCI diagnosis                  | 0.39 (0.15–1.01)  | 0.054   |
| LBCI diagnosis                  | 5.16 (1.27–20.92) | 0.021*  |
| Disease group                   |                   |         |
| Pure ADCI                       | 0.06 (0.01–0.53)  | 0.012*  |
| Pure LBCI                       | Reference         |         |
| Mixed ADCI/LBCI                 | 0.46 (0.16–1.34)  | 0.154   |
| Non-ADCI/LBCI                   | 0.26 (0.04–1.67)  | 0.157   |

Data are results of logistic regression analyses for the presence of comprehension dysfunction using each factor as a predictor after controlling for age, sex, and education level.

\* $p < 0.05$ .

ADCI: Alzheimer's disease-related cognitive impairment, *APOE4*: apolipoprotein E gene E4 variant, BDI: Beck Depression Inventory, CMBs: cerebral microbleeds, K-MMSE: Korean version of Mini-Mental State Examination, LBCI: Lewy-body disease-related cognitive impairment, OR: odds ratio, PTA: pure-tone average, WMHs: white matter hyperintensities, WRS: word recognition score.
